# Supplementary material
Source: PubMed Central journal article supplement (PMC8543757)
Supplement: NIHMS1690407-supplement-1.pdf [file NIHMS1690407-supplement-1.pdf]

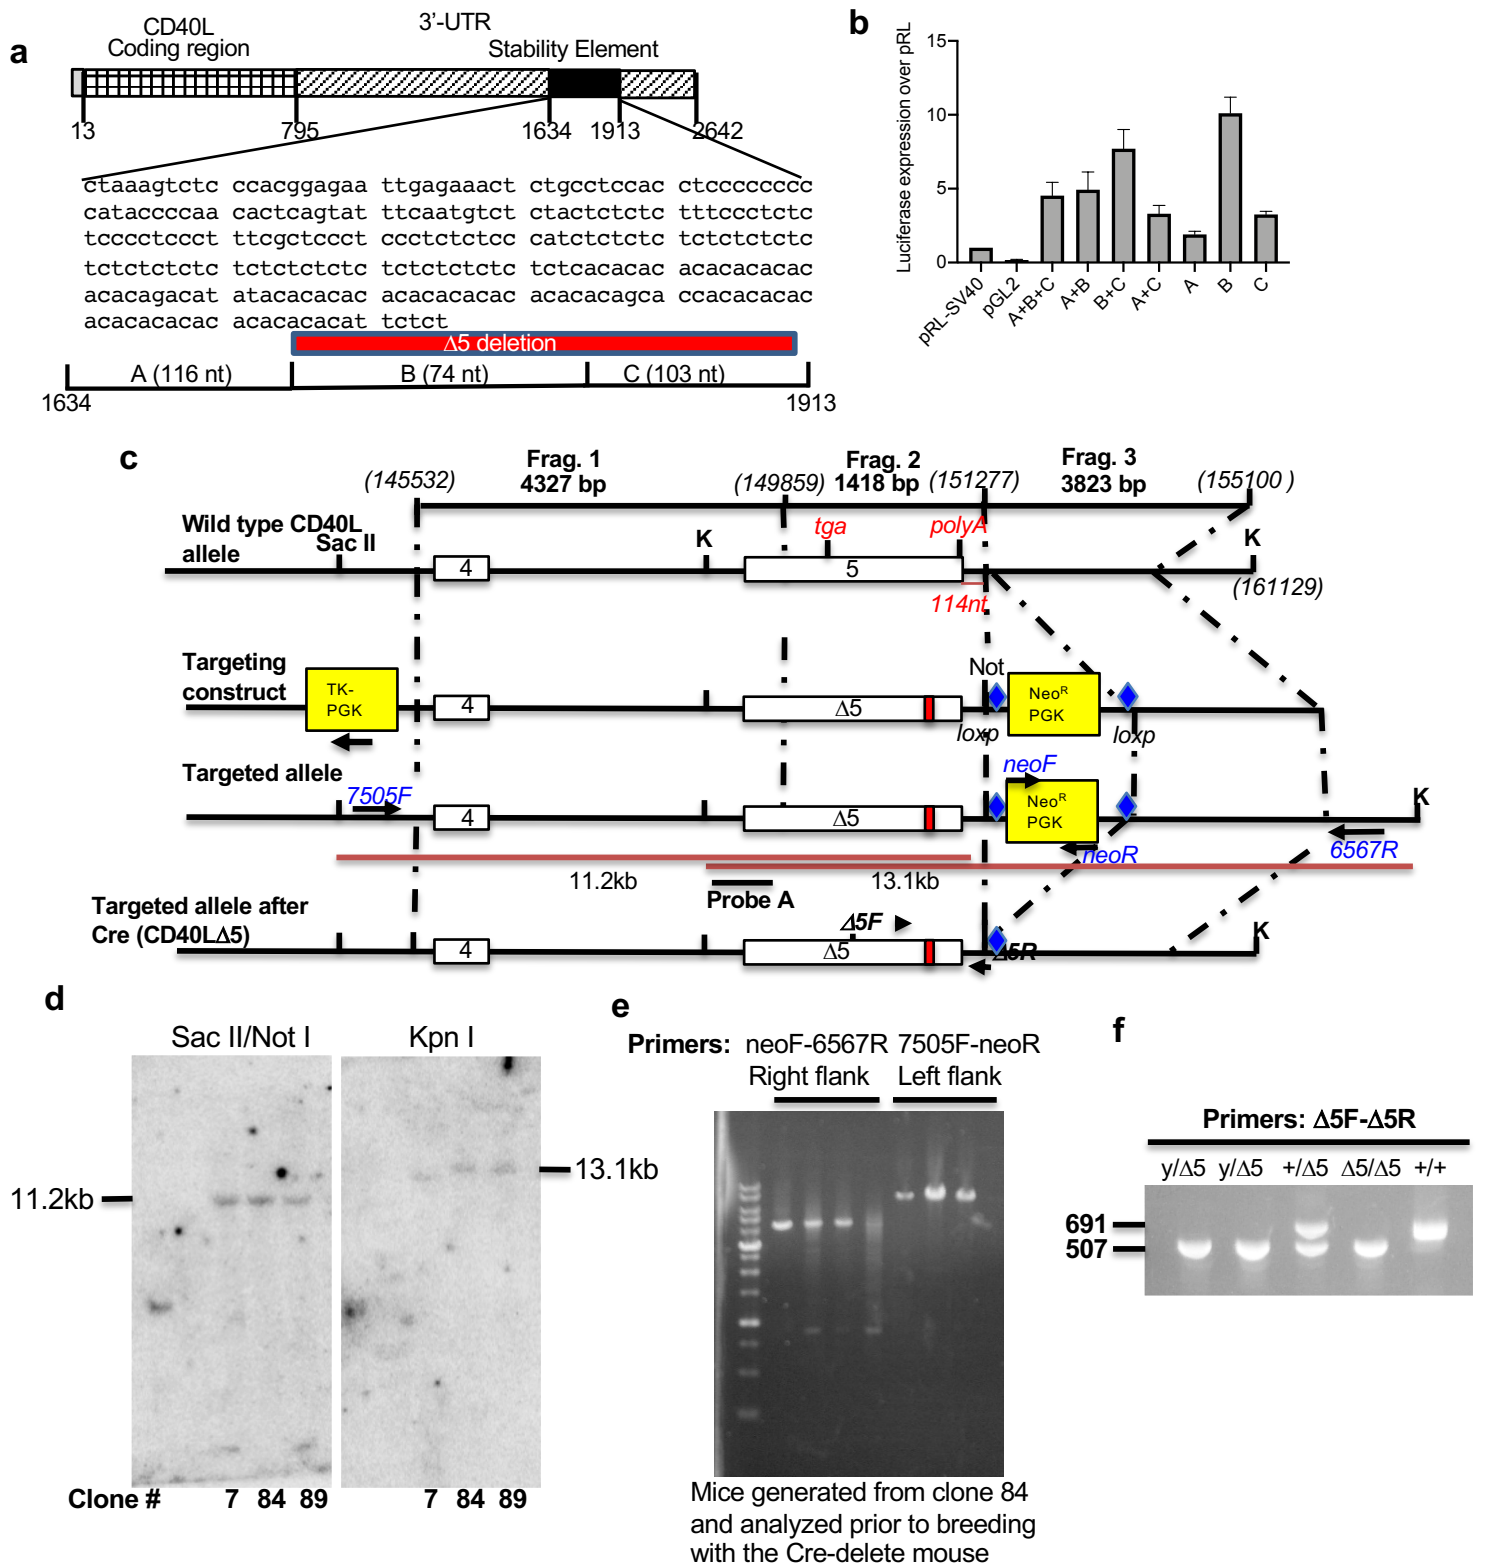

**Supplementary Figure 1.** (a) Schematic of the mCD40L cDNA showing the coding region, 3'UTR stability element and end of exon 5 (1736). (b) Luciferase assays carried out with regions of the CD40L stability element cloned into the 3' region of the pRL-SV40 vector. Results are normalized to expression of *Renilla luciferase*. (c) Schematic diagrams of the CD40L gene showing targeted regions (exons 4 and 5), CD40L $\Delta$ 5 construct, the targeted locus with the Neo<sup>R</sup> gene indicated, and the targeted locus after *Cre*-mediated recombination. Indicated in red is the CD40L translational stop codon and polyA site (114 nt from *loxP* site). Location and size of the three CD40L sequences used in the targeting vector, the neo<sup>R</sup> and TK cassettes, and *loxP* sites are indicated. PCR primers for screening ES cell clones for homologous recombination are depicted with arrows. Position of probe to analyze Southern blots is indicated as **probe A**. (d) ES cell clones analyzed for proper recombination into the genomic locus; clones 84 and 89 of this analysis were used to generate lines of CD40L $\Delta$ 5 mice. (e) Representative PCR from mice generated from clone 84 and carried out with neoF-6567R (right flank) and 7505F-neoR (left flank) primers from outside of the targeting construct. (f) Representative PCR analysis of genomic DNA from mice following deletion of the Neo<sup>R</sup> gene showing hemizygous male mutants (y/ $\Delta$ 5), heterozygous (+/ $\Delta$ 5), homozygous ( $\Delta$ 5/ $\Delta$ 5) and WT females using primers  $\Delta$ 5F and  $\Delta$ 5R.

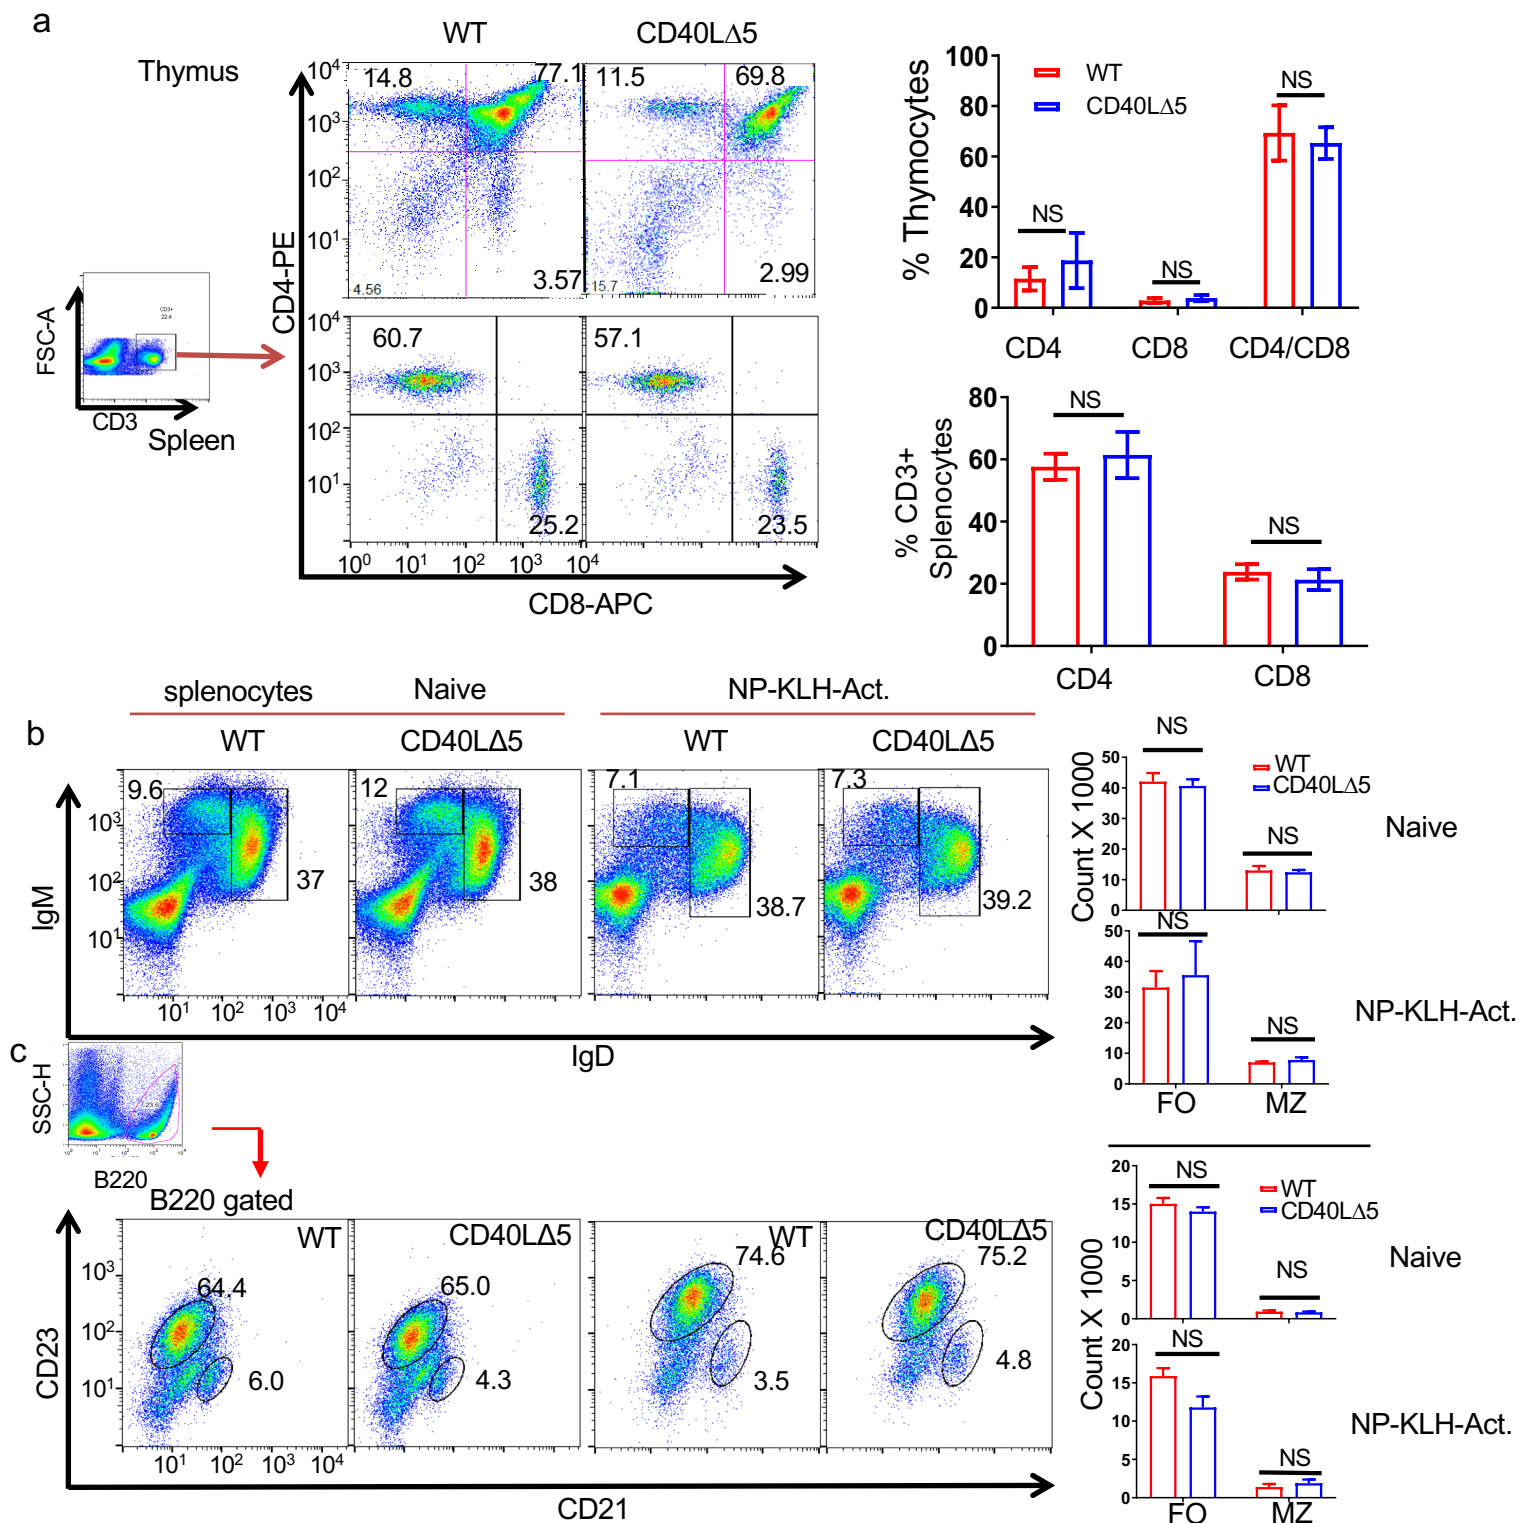

**Supplementary Figure 2. Evaluation of T and B cell populations in CD40L $\Delta$ 5 mice.** (a) Thymus and spleens were collected from 6-10-week-old mice, dissociated and analyzed for distribution of B and T cells. Thymus (top panels) and CD3-gated spleen (bottom panels) were analyzed for CD4 and CD8 expression. Histograms (right) showing the Mean $\pm$ s.e.m. from n=3 experiments. (b) Spleens were collected from naïve (left 2 panels) and day 28 NP-KLH immunized mice (boosted at day 21, right 2 panels). Splenic MZ (IgM<sup>hi</sup>, IgD<sup>lo</sup>) and FO (IgM<sup>+</sup>, IgD<sup>hi</sup>) are boxed and bar graphs of 4 independent experiments are presented on the right. (c) Representative image shows the same groups of cells as in (b) with splenic MZ (B220<sup>+</sup>, CD23<sup>lo</sup>/CD21<sup>hi</sup>), and FO (B220<sup>+</sup>, CD23<sup>hi</sup>/CD21<sup>lo</sup>) populations from WT and CD40L $\Delta$ 5 mice and data from 3 independent experiments compiled in graphs on the right. Significance was determined using student's unpaired t test where a p>0.05 is considered "not significant" (NS).

**Supplementary Table 1:**

Antibodies used for Flow cytometry and Immunohistochemistry. Antibodies designated in **bold** were used in IHC.

| <b>Antigen</b>    | <b>Fluor</b>     | <b>Catalog #</b> | <b>Source</b>    |
|-------------------|------------------|------------------|------------------|
| <b>CD21/35</b>    | <b>FITC</b>      | <b>123407</b>    | <b>Biolegend</b> |
| <b>CD23</b>       | <b>PE</b>        | <b>101607</b>    | <b>Biolegend</b> |
| CD19              | BV570            | 115535           | BioLegend        |
| IgM               | BV510            | 406531           | BioLegend        |
| IgG1              | BV650            | 406629           | BioLegend        |
| <b>IgD</b>        | <b>APC</b>       | <b>405713</b>    | <b>BioLegend</b> |
| CD138             | BV711            | 142519           | BioLegend        |
| CD93              | PerCp-Cy5        | 136511           | BioLegend        |
| Blimp-1           | Alexa 647        | 150003           | BioLegend        |
| CD86              | APC-Fire750      | 105045           | BioLegend        |
| CD86              | Alexa700         | 560581           | BD               |
| CXCR4             | BV421            | 146511           | BioLegend        |
| <b>CXCR4</b>      | <b>Alexa647</b>  | <b>146504</b>    | <b>Biolegend</b> |
| CD38              | Pacific Blue     | 102719           | BioLegend        |
| Fas               | BV605            | 152612           | BioLegend        |
| CD73              | A700             | 127229           | Biolegend        |
| CD80              | PE/Cy7           | 104733           | Biolegend        |
| PD-L2             | PE-Dazzle        | 107215           | Biolegend        |
| B220              | APC              | 103211           | Biolegend        |
| <b>GL7</b>        | <b>Alexa 488</b> | <b>144611</b>    | <b>Biolegend</b> |
| IL-9R             | Purified         | MAB2134-SP       | R&D              |
| 2ry $\alpha$ -rat | BV605            | 405430           | Biolegend        |
| IL-10             | APC/Cy7          | 505035           | Biolegend        |
| <b>CD4</b>        | <b>Alexa 594</b> | <b>100446</b>    | <b>Biolegend</b> |
| CTLA-4            | PE/Dazzle 594    | 106317           | Biolegend        |
| IL-9              | Alexa 700        | IC409N-100ug     | R&D              |
| IL-21             | PE-Cy7           | 25-7213-80       | ThermoFisher     |
| CD40L             | APC              | 106509           | BioLegend        |
| CXCR5             | APC-750          | 145533           | BioLegend        |
| PD-1              | BV711            | 135231           | BioLegend        |
| IgD               | Alexa 647        | 405707           | Biolegend        |
| IL-6              | PE               | 504503           | BioLegend        |
| IL-4              | BV605            | 504126           | BioLegend        |
| Bcl6              | PerCP-Cy5        | 358507           | BioLegend        |
| GATA3             | Alexa 488        | 653807           | BioLegend        |
| Tbet              | BV785            | 644835           | BioLegend        |
| IFN-g             | BV605            | 505832           | BioLegend        |
| Ki-67             | Alexa 594        | 151214           | BioLegend        |
| IL-12             | V450             | 561456           | BD               |

## Supplementary Table 2.

### Primers used to generate and analyze the CD40L $\Delta$ 5 construct

| Target gene      | Purpose                   | NCBI reference | Forward primer                   | NCBI reference | Reverse primer                       |
|------------------|---------------------------|----------------|----------------------------------|----------------|--------------------------------------|
| CD40L genomic    | Frag. 1                   | AL672128.8     | cgggccgctcagcctcctaacgctgacatcat | same           | cggccgcttcaacacagggcagggtcctaact     |
| CD40L genomic    | Frag. 2                   | AL672128.8     | tctacagtgggccaagaaagga           | same           | aaatcacctcagggtgtccagc               |
| CD40L genomic    | Frag. 3                   | AL672128.8     | cggccgctcttgggtggaggctgtaccat    | same           | cgggccgctcaaacatggctgagtaaacctcaagtg |
| CD40L            | deletion-1                | AL672128.8     | ctcccctcccttcgcacacacacacacac    | same           | gtgtgtgtgtgtgtgcgaaagggagggggag      |
| CD40L            | deletion-2                | AL672128.8     | ctctcccctcccttctgtctctattatctacc | same           | gggtagataataagagaacgaaagggaggggagag  |
| CD40L $\Delta$ 5 | PCR-5' integration status | AL672128.8     | gcagcagcaggcacataactggaaa        | Neo            | ccatattggctgcaggctcgaaa              |
| CD40L $\Delta$ 5 | PCR-3' integration status | Neo            | gcaaaacaaaattaagggccagctca       | AL672128.8     | ctcacaatgtagctcaaacatggct            |
| CD40L            | Southern blot probe       | AL672128.8     | atgccgtgctgtgcttaactgac          | same           | ttcaacacagggcagggtcctaact            |
| CD40L            | PCR genotyping            | NM_011616      | tctcactgaccagacttccatctc         | same           | ggtatgtcccgtgactgggc                 |

### qPCR primers

| Target gene | NCBI reference | Forward primer         | Reverse primer         | Size (bp) |
|-------------|----------------|------------------------|------------------------|-----------|
| CD40L       | NM_011616      | acgttgtaagcgaagccaac   | tatccttttggcccactg     | 60        |
| B2M         | NM_007393      | taacacagttcaccgccctca  | gctcggccatactgtcatgctt | 188       |
| GAPDH       | NM_008084      | catggcctccgtgttcta     | cctgcttcaccaccttctgat  | 103       |
| CD69        | NM_001033122   | ggctctggagggtgcgtgtcc  | cgatcatctggagggtgctg   | 97        |
| CD25        | NM_008367      | tggtctagggtctgcgcca    | agcgtctagagtggcctgct   | 90        |
| AICDA-1     | NM_009645      | tctgctacgtggtgaagaggag | ccagtctgagatgtagcgtagg | 110       |
| AICDA-2     | NM_009645      | accgatattggacagcctctg  | accacgtagcagaggtagg    | 103       |
| c-myc       | NM_01849.4     | gttgaaaccccgagaca      | ccagatatcctcactgggcg   | 178       |

### V186.2 primers

| Primer Name   | Accession Number | Sequence                      |
|---------------|------------------|-------------------------------|
| Cy1-cDNA      | MH397224.1       | 5'-catggagtagtggggcag-3'      |
| V186.2-leader | J00529           | 5'-agctgtatcatgctcttctggca-3' |
| V186.2-nested | J00529           | 5'-catgctcttctggcagcaacag-3'  |
| Cy1-PCR       | MH397224.1       | 5'-atccaggggcccaggtagtagac-3' |
